# Supplementary material for: Mapping ethical issues encompassing end-of-life care for persons experiencing severe and persistent mental illness: a qualitative study
Source: Research Square preprint supplement (doi:10.21203/rs.3.rs-5699095/v1), 2025-04-23
Supplement: Supplementary file 1 [file 2aa07bfae0c6c0f0d9ac35be.docx]

**Appendix 5: Overview of Themes**

| **Category** | **Components/Practices** | **Key Challenges/Observations** |
| --- | --- | --- |
| **Ethics Support** | **Organizational Level:** • Ethics committees • Ethics experts • Ethical advisory texts | • Low usage among frontline staff • Limited awareness among caregivers, care users, and families • Primarily referenced by managers and ethics specialists |
|  | **Team Level:** • Informal team discussions • Reference persons/ethics focal points • “Ethics pubs” (informal discussions involving all staff, family, etc.) | • Caregivers sometimes feel isolated in decision-making • Delays in accessing formal ethics support when needed |
| **Substantive Ethical Themes** | **Euthanasia:** • Debate over requests and acceptability • Balancing autonomy and protection | • Divided opinions, especially among caregivers and physicians • Significant emotional and legal implications |
|  | **Refusal of Care:** • Patient autonomy vs. duty of care | • Ethical dilemma when patients decline care • Challenges in balancing respect for autonomy with potential risks |
|  | **Fair Allocation of Resources:** • Resource distribution in palliative situations | • Concerns about dedicating extensive time to a single patient affecting other care users • Ethical tensions around fairness |
|  | **Palliative Sedation:** • Decisions regarding sedation for prolonged or traumatic dying processes | • Ethical uncertainty and distress over long dying processes • Impact on caregivers and family members |
|  | **Oyster Care Model:** • Innovative, creative care approach vs. traditional recovery-oriented care • Balancing regulatory constraints and tailored care | • Tension between offering individualized, creative care and adhering to established regulations • Concerns about crossing professional boundaries |
