# Supplementary material for: Mapping ethical issues encompassing end-of-life care for persons experiencing severe and persistent mental illness: a qualitative study
Source: Research Square preprint supplement (doi:10.21203/rs.3.rs-5699095/v1), 2025-04-23
Supplement: Supplementary file 2 [file 4f93c6703cbb2d5d06b5ac1e.docx]

**Appendix 1**: Demographics

Caregivers, managers and experts (n=44)

| Gender | Male: 18 | Female: 26 | X:0 |  |
| --- | --- | --- | --- | --- |
| Age group  (in years) | 20-30: 8 | 31-40:7 | 41-50: 16 | 50+: 13 |
| Background | Nurse: 20 | Physician: 6 | Therapist: 4 | Other: 14* |

* personal assistant/ethicist/pastor/experience-worker/social worker

Care users (n= 17)

| Gender | Male: 5 | Female: 12 | X: 0 |  |
| --- | --- | --- | --- | --- |
| Age group  (in years) | 2-30: 2 | 31-40: 3 | 41-50: 7 | 50+: 5 |
| Primary diagnosis | Psychosis: 9 | Drug-abuse: 3 | Mood disorder: 3 | Bipolar disorder: 2 |

Next of kin (n=12)

| Gender | Male: 3 | Female: 9 | X: 0 |  |  |
| --- | --- | --- | --- | --- | --- |
| Age group  (in years) | 20-30: 0 | 31-40: 1 | 41-50: 4 | 51-60: 2 | 60+: 5 |
| Kinship | Sibling: 5 | Partner: 1 | Parent: 4 | Child: 2 |  |
