# Supplementary material for: Mapping ethical issues encompassing end-of-life care for persons experiencing severe and persistent mental illness: a qualitative study
Source: Research Square preprint supplement (doi:10.21203/rs.3.rs-5699095/v1), 2025-04-23
Supplement: Supplementary file 3 [file 6d88aafff3aa08706909e688.docx]

Appendix 3: Interview guide care users and next-of-kin

Demographic data

Can you briefly outline the course that was taken in mental health care?

What does good care mean to you?

What barriers do you encounter in care?

Do you ever think about end-of-life and the care you would want then?

What does good end-of-life care mean to you?

What are your sources of strength, and what do you sometimes worry about?

Are there no issues you would like to add?
