# Supplementary material for: Mapping ethical issues encompassing end-of-life care for persons experiencing severe and persistent mental illness: a qualitative study
Source: Research Square preprint supplement (doi:10.21203/rs.3.rs-5699095/v1), 2025-04-23
Supplement: Supplementary file 4 [file 833b101474ac50ae1ec66e71.docx]

**Appendix 4: Inclusion and exclusion criteria**

For all target groups, an effort was made to achieve a representative distribution in terms of characteristics such as age, gender, education, conditions, relationships, etc.

**Caregivers:**

- Any gender or religious background
- Involved in the care of persons with severe and persistent mental illness (SPMI)
- Of legal age
- Understand and speak Dutch
- Willingly agree to participate in the study and are willing to sign the consent form

**Next-of-kin:**

- Any gender or religious background
- Are family members or are closely involved with a person experiencing SPMI
- Of legal age
- Understand and speak Dutch
- Willingly agree to participate in the study and are willing to sign the consent form

**Persons in Management, Policy, or Expert Roles:**

- Any gender or religious background
- Hold a management position, policy role, or specific expert role in an organization providing care for persons experiencing SPMI
- Of legal age
- Understand and speak Dutch
- Willingly agree to participate in the study and are willing to sign the consent form

**Care users experiencing SPMI:**

- The patients had a hospitalization duration of two years or more, had a diagnosis according to the Diagnostic and Statistical Manual of Mental Disorders 5 (DSM-5) and experienced severe impairments in daily life (1).
- Of legal age
- Understand and speak Dutch
- Willingly agree to participate in the study and are willing to sign the consent form
- Capable of providing an account of their experiences
- If a legal representative has been appointed for the individual, the representative is also asked to sign the consent form.
- The treating physician and caregivers have no objections to participation in the study.
- Not in an acute crisis situation (e.g., suicide, grief, etc.)
- If desired, the person may be accompanied by a confidant (relative or caregiver) during the interview.
