# Supplementary material for: Mapping ethical issues encompassing end-of-life care for persons experiencing severe and persistent mental illness: a qualitative study
Source: Research Square preprint supplement (doi:10.21203/rs.3.rs-5699095/v1), 2025-04-23
Supplement: Supplementary file 5 [file fd38a14efa6e4db473564ca6.docx]

**Appendix 2: Interview guide for caregivers, managers and experts**

demographic data

What is your relationship with the target group of persons experiencing SPMI?

How do you encounter end-of-life care in this target group? What experiences do you have with this topic? (with regard to advance care planning, palliative care, euthanasia, suicide and bereavement care)

Can you provide examples of good practices and facilitators?

Can you give examples of barriers encountered?

What are the needs and expectations of care users in this situation?

What are important ethical issues in this context, and how do you deal with them?

Are you familiar with the palliative care approach for this target group? If so, what are the advantages and disadvantages of this approach?

Do you have any additions of your own regarding end-of-life care for persons experiencing SPMI?
